# Supplementary material for: A highly selective turn-on fluorescent sensor for Cu(ii) based on an NSe2 chelating moiety and its application in living cell imaging
Source: Royal Society of Chemistry journal article supplement (doi:10.1039/c3an00286a), 2013-01-01
Supplement: c3an00286a.pdf [file c3an00286a.pdf]

Supplementary data for:

**Highly selective turn-on fluorescent sensor for Cu(II) based on an NSe<sub>2</sub> chelating moiety and its application in living cell imaging**

Cho-Yen Chou, Shi-Rong Liu and Shu-Pao Wu\*

*Department of Applied Chemistry, National Chiao Tung University, Hsinchu, Taiwan  
300, Republic of China*

Tel.: +886-3-5712121-ext56506

Fax: +886-3-5723764

E-mail: spwu@mail.nctu.edu.tw

**Contents**

- 1. Figure S1.** <sup>1</sup>H NMR spectra (300 MHz) of compound **CBS** in CDCl<sub>3</sub>.
- 2. Figure S2.** <sup>13</sup>C NMR spectra (75 MHz) of compound **CBS** in CDCl<sub>3</sub>.
- 3. Figure S3.** ESI-Mass of **CBS**
- 4. Figure S4.** ESI-Mass of **CBS-Cu<sup>2+</sup>** complex.
- 5. Figure S5.** The detection limit of chemosensor **CBS** (15 μM) with Cu<sup>2+</sup> in acetonitrile-water (v/v = 7:3, 10 mM HEPES, pH 7) solutions.

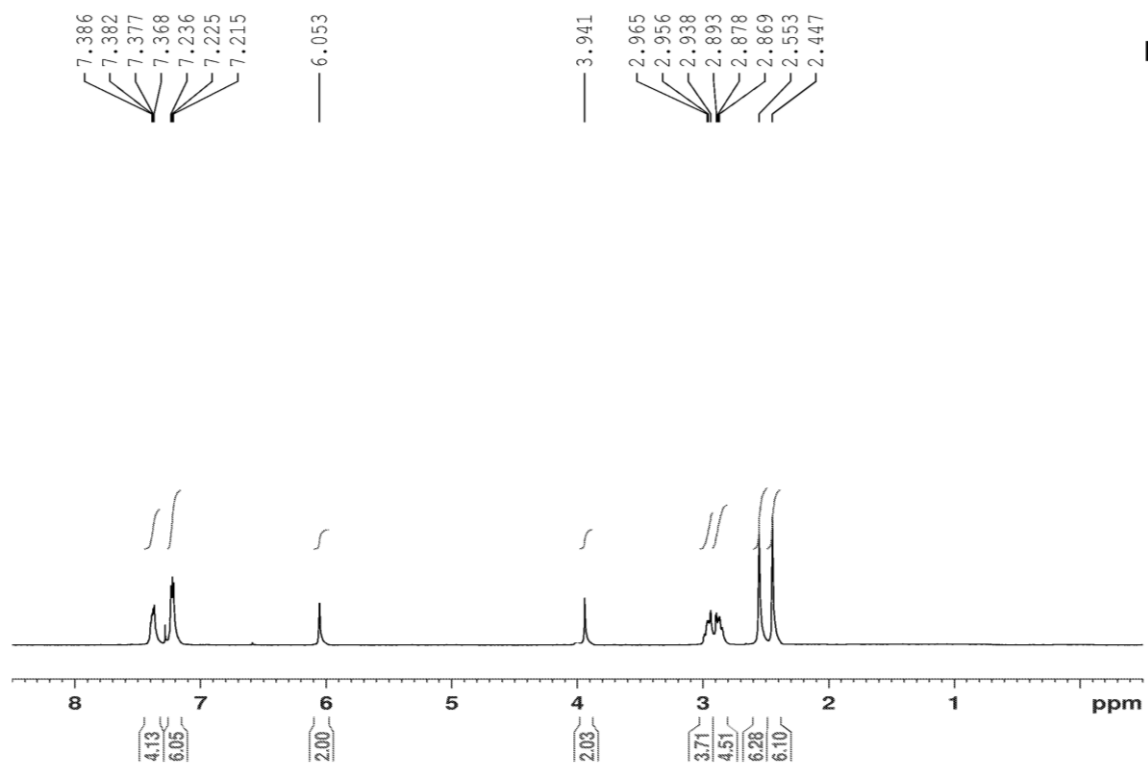

**Figure S1.**  $^1\text{H}$  NMR spectra (300 MHz) of compound **CBS** in  $\text{CDCl}_3$

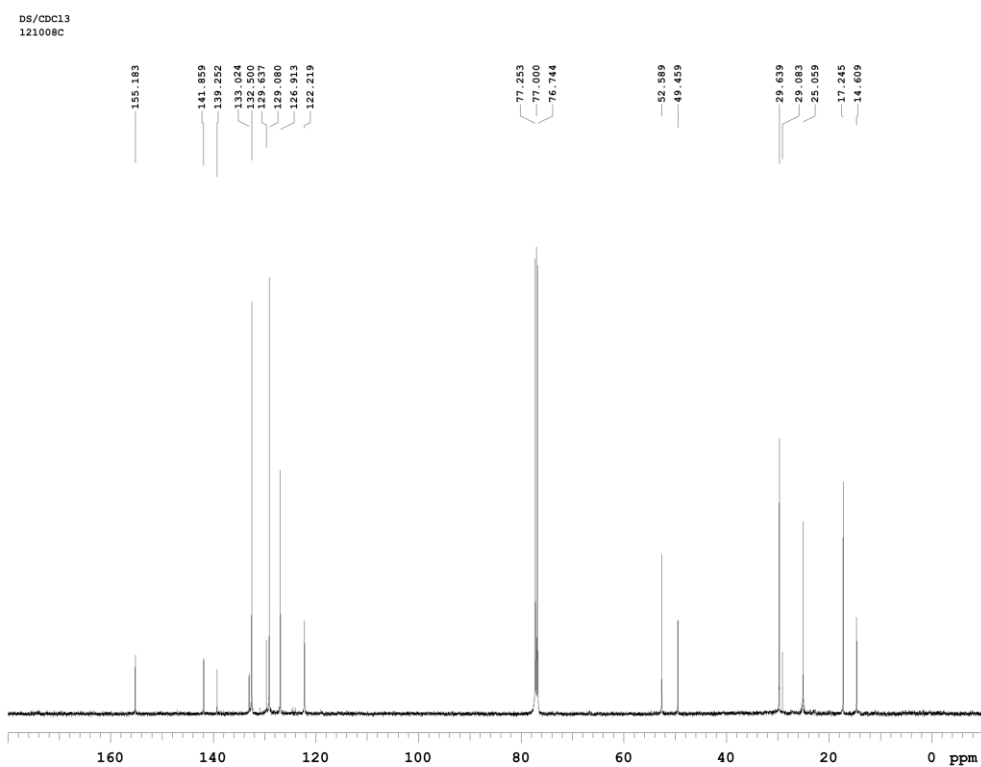

**Figure S2.**  $^{13}\text{C}$  NMR spectra (75 MHz) of compound **CBS** in  $\text{CDCl}_3$

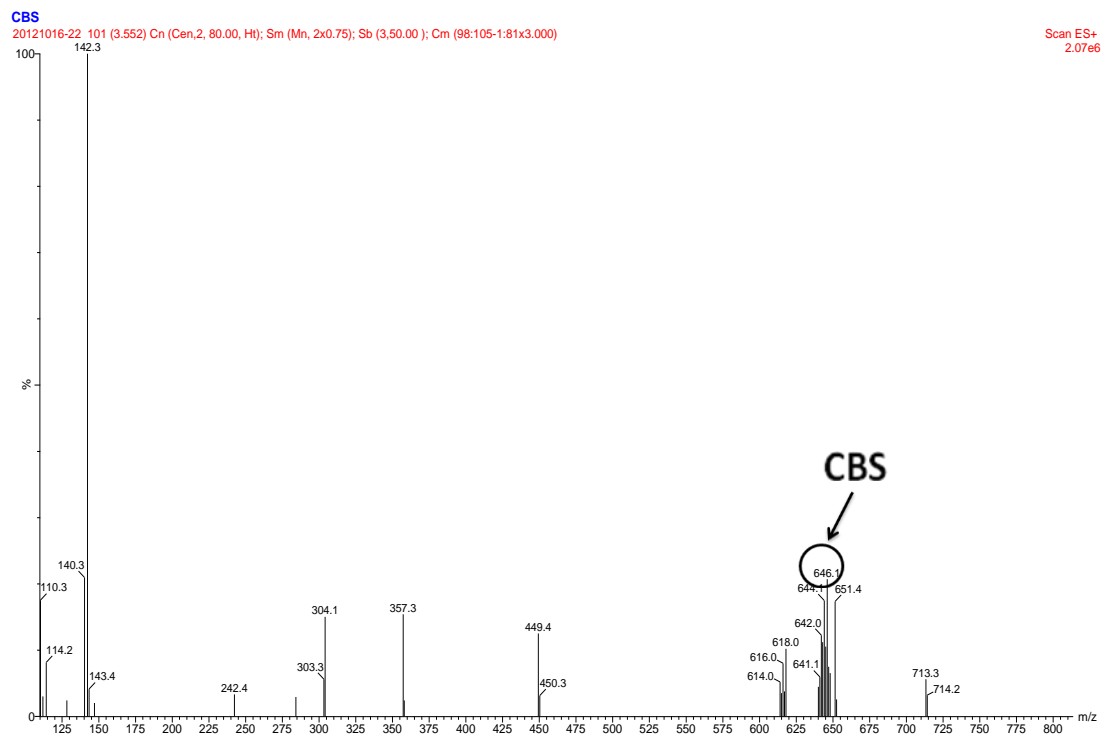

**Figure S3.** ESI-Mass of CBS

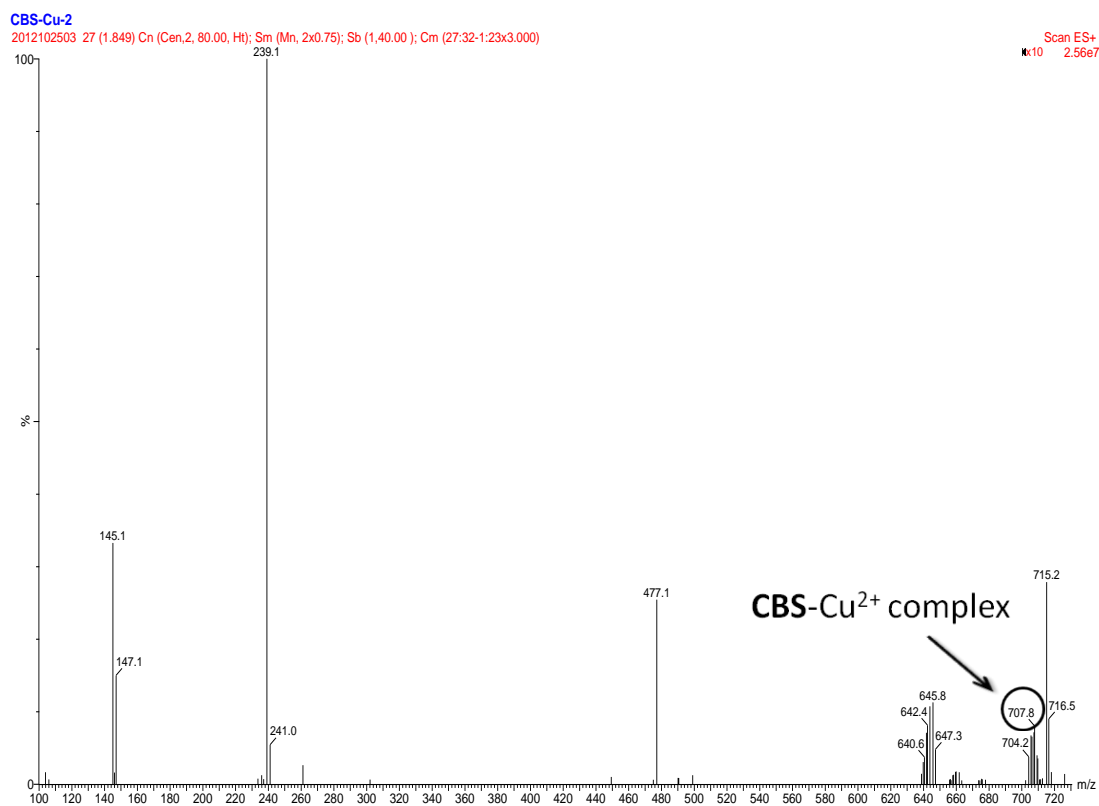

**Figure S4.** ESI-Mass of **CBS-Cu<sup>2+</sup>** complex.

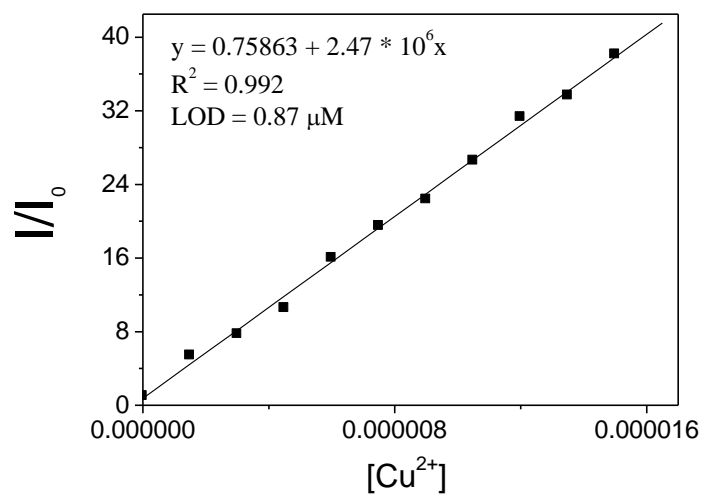

**Figure S5.** The detection limit of chemosensor **CBS** (15  $\mu\text{M}$ ) with **Cu<sup>2+</sup>** in acetonitrile-water (v/v = 7:3, 10 mM HEPES, pH 7.0) solutions. The excitation wavelength was 500 nm and observed wavelength was 516 nm. The detection limit for **Cu<sup>2+</sup>** binding in **CBS** was 0.87  $\mu\text{M}$ .
